# Supplementary material
Source: MDPI journal article supplement (https://www.mdpi.com/2072-4292/8/1/70)
Supplement: s1 [file s1]

# Supplementary Materials: A review of the application of optical and radar remote sensing data fusion to land use mapping and monitoring.

*Remote Sensing* 2016, 8, 70.

Neha Joshi, Matthias Baumann, Andrea Ehammer, Rasmus Fensholt, Kenneth Grogan, Patrick Hostert, Martin Rudbeck Jepsen, Tobias Kuemmerle, Patrick Meyfroidt, Edward T A Mitchard, Johannes Reiche, Casey M Ryan and Björn Waske

## 1. List of studies addressing land use

- [1] AMARSAIKHAN, D., SAANDAR, M., GANZORIG, M., BLOTEVOGEL, H. H., EGSHIGLEN, E., GANTUYAL, R., NERGUI, B., AND ENKHJARGAL, D. Comparison of multisource image fusion methods and land cover classification. *International Journal of Remote Sensing* 33, 8 (2012), 2532–2550.
- [2] BAN, Y., HU, H., AND RANGEL, I. M. Fusion of Quickbird MS and RADARSAT SAR data for urban land-cover mapping: object-based and knowledge-based approach. *International Journal of Remote Sensing* 31, 6 (2010), 1391–1410.
- [3] BLAES, X., VANHALLE, L., AND DEFOURNY, P. Efficiency of crop identification based on optical and SAR image time series. *Remote Sensing of Environment* 96, 3-4 (2005), 352–365.
- [4] CARVALHO, L. M. T. D., RAHMAN, M. M., HAY, G. J., AND YACKEL, J. Optical and SAR imagery for mapping vegetation gradients in Brazilian Savannas: synergy between pixel-based and object-based approaches. *Proceeding Papers GEOBIA. GEOgraphic object-based image analysis* (2010).
- [5] CHUST, G., DUCROT, D., AND PRETUS, J. L. Land cover discrimination potential of radar multitemporal series and optical multispectral images in a Mediterranean cultural landscape. *International Journal of Remote Sensing* 25, 17 (2004), 3513–3528.
- [6] CLEVERS, J., AND VANLEEUEWEN, H. Combined use of optical and microwave remote sensing data for crop growth monitoring. *Remote Sensing of Environment* 56, 1 (1996), 42–51.

- [7] CLOUTIS, E., CONNERY, D., AND DOVER, F. Agricultural crop monitoring using airborne multi-spectral imagery and C-band synthetic aperture radar. *International Journal of Remote Sensing* 20, 4 (1999), 767–787.
- [8] DONG, J., XIAO, X., CHEN, B., TORBICK, N., JIN, C., ZHANG, G., AND BIRADAR, C. Mapping deciduous rubber plantations through integration of PALSAR and multi-temporal Landsat imagery. *Remote Sensing of Environment* 134 (2013), 392–402.
- [9] DONG, J., XIAO, X., SHELDON, S., BIRADAR, C., AND XIE, G. Mapping tropical forests and rubber plantations in complex landscapes by integrating PALSAR and MODIS imagery. *ISPRS Journal Of Photogrammetry and Remote Sensing* 74 (2012), 20–33.
- [10] DUSSEUX, P., CORPETTI, T., HUBERT-MOY, L., AND CORGNE, S. Combined use of multi-temporal optical and radar satellite images for grassland monitoring. *Remote Sensing* 6, 7 (2014), 6163–6182.
- [11] ERASMI, S., AND TWELE, A. Regional land cover mapping in the humid tropics using combined optical and SAR satellite dataa case study from Central Sulawesi, Indonesia. *International Journal of Remote Sensing* 30, 10 (2009), 2465–2478.
- [12] FARAH, I. R., BOULILA, W., ETTABAA, K. S., AND AHMED, M. B. Multiapproach system based on fusion of multispectral images for land-cover classification. *IEEE Transactions on Geoscience and Remote Sensing* 46, 12 (2008), 4153–4161.
- [13] FORKUOR, G., CONRAD, C., THIEL, M., ULLMANN, T., AND ZOUNGRANA, E. Integration of optical and Synthetic Aperture Radar Imagery for improving crop mapping in Northwestern Benin, West Africa. *Remote Sensing* 6, 7 (2014), 6472–6499.
- [14] FRANSSON, J., WALTER, F., AND OLSSON, H. Identification of clear felled areas using SPOT P and Almaz-1 SAR data. *International Journal of Remote Sensing* 20, 18 (1999), 3583–3593.
- [15] HAACK, B., AND BECHDOL, M. Integrating multisensor data and RADAR texture measures for land cover mapping. *Computers and GeoScience* 26, 4 (2000), 411–421.
- [16] HAACK, B., HEROLD, N., AND BECHDOL, M. Radar and optical data integration for land-use/land-cover mapping. *Photogrammetric Engineering and Remote Sensing* 66, 6 (2000), 709–716.

- [17] HADRIA, R., DUCHEMIN, B., BAUP, F., TOAN, T. L., BOUVET, A., DEDIEU, G., AND PAGE, M. L. Combined use of optical and radar satellite data for the detection of tillage and irrigation operations: Case study in Central Morocco. *Agricultural Water Management* 96, 7 (2009), 1120–1127.
- [18] HADRIA, R., DUCHEMIN, B., JARLAN, L., DEDIEU, G., BAUP, F., KHABBA, S., OLIOSO, A., AND LE TOAN, T. Potentiality of optical and radar satellite data at high spatio-temporal resolutions for the monitoring of irrigated wheat crops in Morocco. *International Journal of Applied Earth Observation and Geoinformation* 12, 1 (2010), S32–S37.
- [19] HELLWICH, O., GUNZL, M., AND WIEDEMANN, C. Fusion of SAR/INSAR data and optical imagery for landuse classification. *Frequenz* 55, 3-4 (2001), 129–136.
- [20] HILL, M., TICEHURST, C., LEE, J., GRUNES, M., DONALD, G., AND HENRY, D. Integration of optical and radar classifications for mapping pasture type in western Australia. *IEEE Transactions on Geoscience and Remote Sensing* 43, 7 (2005), 1665–1681.
- [21] HOLMSTRÖM, H., AND FRANSSON, J. Combining remotely sensed optical and radar data in kNN-estimation of forest variables. *Forest Science* 49, 3 (2003), 409–418.
- [22] IDOL, T., HAACK, B., AND MAHABIR, R. Comparison and integration of spaceborne optical and radar data for mapping in Sudan. *International Journal of Remote Sensing* 36, 6 (2015), 1551–1569.
- [23] KOU, W., XIAO, X., DONG, J., GAN, S., ZHAI, D., ZHANG, G., QIN, Y., AND LI, L. Mapping Deciduous Rubber Plantation Areas and Stand Ages with PALSAR and Landsat Images. *Remote Sensing* 7, 1 (2015), 1048.
- [24] KUPLICH, T. M. Classifying regenerating forest stages in Amazonia using remotely sensed images and a neural network. *Forest Ecology and Management* 234, 1-3 (2006), 1–9.
- [25] KUPLICH, T. M., FREITAS, C. C., AND SOARES, J. V. The study of ERS-1 SAR and Landsat TM synergism for land use classification. *International Journal of Remote Sensing* 21, 10 (2000), 2101–2111.
- [26] LARRAÑAGA, A., LVAREZ MOZOS, J., AND ALBIZUA, L. Crop classification in rain-fed and irrigated agricultural areas using Landsat TM and ALOS/PALSAR data. *Canadian Journal of Remote Sensing* 37, 1 (2011), 157–170.

- [27] LAURILA, H., KARJALAINEN, M., HYYPP, J., AND KLEEMOLA, J. Integrating Vegetation Indices Models and Phenological Classification with Composite SAR and Optical Data for Cereal Yield Estimation in Finland (Part I). *Remote Sensing* 2, 1 (2009), 76.
- [28] LE HEGARAT-MASCLE, S., QUESNEY, A., VIDAL-MADJAR, D., TACONET, O., NORMAND, M., AND LOUMAGNE, C. Land cover discrimination from multitemporal ERS images and multispectral Landsat images: a study case in an agricultural area in France. *International Journal of Remote Sensing* 21, 3 (2000), 435–456.
- [29] LU, D., BATISTELLA, M., LI, G., MORAN, E., HETRICK, S., DA COSTA FREITAS, C., DUTRA, L. V., AND SANT'ANNA, S. J. S. Land use/cover classification in the Brazilian Amazon using satellite images. *Pesquisa Agropecuaria Brasileira* 47, 9 (2012), 1185–1208.
- [30] MCNAIRN, H., CHAMPAGNE, C., SHANG, J., HOLMSTROM, D., AND REICHERT, G. Integration of optical and Synthetic Aperture Radar (SAR) imagery for delivering operational annual crop inventories. *{ISPRS} Journal of Photogrammetry and Remote Sensing* 64, 5 (2009), 434 – 449.
- [31] MCNAIRN, H., ELLIS, J., VAN DER SANDEN, J. J., HIROSE, T., AND BROWN, R. J. Providing crop information using RADARSAT-1 and satellite optical imagery. *International Journal of Remote Sensing* 23, 5 (2002), 851–870.
- [32] MCNAIRN, H., SHANG, J., JIAO, X., AND CHAMPAGNE, C. The Contribution of ALOS PALSAR Multipolarization and Polarimetric Data to Crop Classification. *IEEE Transactions on Geoscience and Remote Sensing* 47, 12 (2009), 3981–3992.
- [33] MICHELSON, D., LILJEBERG, B., AND PILESJO, P. Comparison of algorithms for classifying Swedish landcover using Landsat TM and ERS-1 SAR data. *Remote Sensing of Environment* 71, 1 (2000), 1–15.
- [34] OKAMOTO, K., AND KAWASHIMA, H. Estimation of rice-planted area in the tropical zone using a combination of optical and microwave satellite sensor data. *International Journal of Remote Sensing* 20, 5 (1999), 1045–1048.
- [35] OZDARICI OK, A., AND AKYUREK, Z. A segment-based approach to classify agricultural lands by using multi-temporal optical and microwave data. *International Journal of Remote Sensing* 33, 22 (2012), 7184–7204.

- [36] PEREIRA, L. D. O., FREITAS, C. D. C., ST ANNA, S. J. S., LU, D., AND MORAN, E. F. Optical and radar data integration for land use and land cover mapping in the Brazilian Amazon. *GIScience and Remote Sensing* 50, 3 (2013), 301–321.
- [37] PETERS, J., COILLIE, F. V., WESTRA, T., AND WULF, R. D. Synergy of very high resolution optical and radar data for object-based olive grove mapping. *International Journal of Geographical Information Science* 25, 6 (2011), 971–989.
- [38] REVILL, A., SUS, O., BARRETT, B., AND WILLIAMS, M. Carbon cycling of european croplands: A framework for the assimilation of optical and microwave earth observation data. *Remote Sensing of Environment* 137, 0 (2013), 84 – 93.
- [39] ROBERTS, J. W., VAN AARDT, J. A. N., AND AHMED, F. B. Image fusion for enhanced forest structural assessment. *International Journal of Remote Sensing* 32, 1 (2011).
- [40] SANTOS, C., AND MESSINA, J. P. Multi-sensor data fusion for modeling African palm in the Ecuadorian Amazon. *Photogrammetric Engineering and Remote Sensing* 74, 6 (2008), 711–723.
- [41] SHEORAN, A., AND HAACK, B. Optical and radar data comparison and integration: Kenya example. *Geocarto International* 29, 4 (2014), 370–382.
- [42] SIEGERT, F., RUECKER, G., HINRICHS, A., AND HOFFMANN, A. Increased damage from fires in logged forests during droughts caused by El Nino. *Nature* 414, 6862 (2001), 437–440.
- [43] SOLBERG, A., TAXT, T., AND JAIN, A. A Markov random field model for classification of multisource satellite imagery. *IEEE Transactions on Geoscience and Remote Sensing* 34, 1 (1996), 100–113.
- [44] SORIA-RUIZ, J., FERNANDEZ-ORDONEZ, Y., AND WOODHOUSE, I. H. Land-cover classification using radar and optical images: a case study in Central Mexico. *International Journal of Remote Sensing* 31, 12 (2010), 3291–3305.
- [45] STEFANSKI, J., KUEMMERLE, T., CHASKOVSKYY, O., GRIFFITHS, P., HAVRYLUK, V., KNORN, J., KOROL, N., SIEBER, A., AND WASKE, B. Mapping Land Management Regimes in Western Ukraine Using Optical and SAR Data. *Remote Sensing* 6, 6 (2014), 5279–5305.

- [46] TORBICK, N., AND SALAS, W. Mapping agricultural wetlands in the Sacramento Valley, USA with satellite remote sensing. *Wetlands Ecology and Management* 23, 1 (2015), 79–94.
- [47] TORBICK, N., SALAS, W., XIAO, X., INGRAHAM, P., FEARON, M., BIRADAR, C., ZHAO, D., LIU, Y., LI, P., AND ZHAO, Y. Integrating SAR and optical imagery for regional mapping of paddy rice attributes in the Poyang Lake Watershed, China. *Canadian Journal of Remote Sensing* 37, 1 (2011), 17–26.
- [48] VESCOVI, F., AND GOMARASCA, M. Integration of optical and microwave remote sensing data for agricultural land use classification. *Environmental Monitoring and Assessment* 58, 2 (1999), 133–149.
- [49] WANG, Y.-C., FENG, C.-C., AND DUC, H. V. Integrating Multi-Sensor Remote Sensing Data for Land Use/Cover Mapping in a Tropical Mountainous Area in Northern Thailand. *GEOGRAPHICAL RESEARCH* 50, 3 (2012), 320–331.
- [50] ZHU, Z., WOODCOCK, C. E., ROGAN, J., AND KELLNDORFER, J. Assessment of spectral, polarimetric, temporal, and spatial dimensions for urban and peri-urban land cover classification using Landsat and SAR data. *Remote Sensing of Environment* 117 (2012), 72–82.

## 2. List of studies addressing land cover

- [51] AMINI, J., AND SUMANTYO, J. T. S. Employing a Method on SAR and Optical Images for Forest Biomass Estimation. *IEEE Transactions on Geoscience and Remote Sensing* 47, 12 (2009), 4020–4026.
- [52] ARMAND, N. A., CHIMITDORZHIEV, T. N., EFREMENKO, V. V., ZAKHAROV, A. I., SEMENOV, A., AND MOSHKOV, A. The prospects of simultaneous processing of L-band radar and optical-band spectrozomal images for the classification of forest tracts. *Journal Of Communications Technology and Electronics* 43, 9 (1998), 995–999.
- [53] ATTARCHI, S., AND GLOAGUEN, R. Improving the Estimation of Above Ground Biomass Using Dual Polarimetric PALSAR and ETM plus Data in the Hyrcanian Mountain Forest (Iran). *Remote Sensing* 6, 5 (2014), 3693–3715.
- [54] AUGUSTEIJN, M. F., AND WARRENDER, C. E. Wetland classification using optical and radar data and neural network classification. *International Journal of Remote Sensing* 19, 8 (1998), 1545–1560.
- [55] BAEK, J., KIM, J. W., LIM, G. J., AND LEE, D.-C. Electromagnetic land surface classification through integration of optical and radar remote sensing data. *Geoscience and Remote Sensing, IEEE Transactions on* 49, 4 (2011), 1215–1223.
- [56] BARRAZA, V., GRINGS, F., FERRAZZOLI, P., SALVIA, M., MAAS, M., RAHMOUNE, R., VITTUCCI, C., AND KARSZENBAUM, H. Monitoring vegetation moisture using passive microwave and optical indices in the dry Chaco forest, Argentina. *Selected Topics in Applied Earth Observations and Remote Sensing, IEEE Journal of* 7, 2 (2014), 421–430.
- [57] BLANCO, P. D., METTERNICHT, G. I., AND VALLE, H. F. D. Improving the discrimination of vegetation and landform patterns in sandy rangelands: a synergistic approach. *International Journal of Remote Sensing* 30, 10 (2009), 2579–2605.
- [58] BWANGOY, J.-R. B., HANSEN, M. C., ROY, D. P., GRANDI, G. D., AND JUSTICE, C. O. Wetland mapping in the Congo Basin using optical and radar remotely sensed data and derived topographical indices. *Remote Sensing of Environment* 114, 1 (2010), 73–86.
- [59] CARTUS, O., KELLNDORFER, J., WALKER, W., FRANCO, C., BISHOP, J., SANTOS, L., AND FUENTES, J. M. M. A National, Detailed Map of Forest Aboveground Carbon Stocks in Mexico. *Remote Sensing* 6, 6 (2014), 5559.

- [60] CORCORAN, J., KNIGHT, J., BRISCO, B., KAYA, S., CULL, A., AND MURNAGHAN, K. The integration of optical, topographic, and radar data for wetland mapping in northern Minnesota. *Canadian Journal of Remote Sensing* 37, 5 (2011), 564–582.
- [61] CREMON, É. H., DE FÁTIMA ROSSETTI, D., AND ZANI, H. Classification of vegetation over a residual megafan landform in the Amazonian lowland based on Optical and SAR imagery. *Remote Sensing* 6, 11 (2014), 10931.
- [62] DRAPER, F. C., ROUCOUX, K. H., LAWSON, I. T., MITCHARD, E. T. A., CORONADO, E. N. H., LÄHTEENOJA, O., MONTENEGRO, L. T., SANDOVAL, E. V., ZARÁTE, R., AND BAKER, T. R. The distribution and amount of carbon in the largest peatland complex in Amazonia. *Environmental Research Letters* 9, 12 (2014), 124017.
- [63] DURIEUX, L., KROPACEX, J., DE GRANDI, G. D., AND ACHARD, F. Object-oriented and textural image classification of the Siberia GBFM radar mosaic combined with MERIS imagery for continental scale land cover mapping. *International Journal of Remote Sensing* 28, 18 (2007), 4175–4182.
- [64] FRANSSON, J., SMITH, G., ASKNE, J., AND OLSSON, H. Stem volume estimation in boreal forests using ERS-1/2 coherence and SPOT XS optical data. *International Journal of Remote Sensing* 22, 14 (2001), 2777–2791.
- [65] FROLKING, S., FAHNESTOCK, M., MILLIMAN, T., McDONALD, K., AND KIMBALL, J. Interannual variability in North American grassland biomass/productivity detected by SeaWinds scatterometer backscatter. *Geophysical Research Letters* 32, 21 (2005).
- [66] FURTADO, L. F. D. A., SILVA, T. S. F., FERNANDES, P. J. F., AND NOVO, E. M. L. O. D. M. Land cover classification of Lago Grande de Curuai floodplain (Amazon, Brazil) using multi-sensor and image fusion techniques. *Acta Amazonica* 45 (06 2015), 195 – 202.
- [67] GAMBA, P., AND HOUSHMAND, B. An efficient neural classification chain of SAR and optical urban images. *International Journal of Remote Sensing* 22, 8 (2001), 1535–1553.
- [68] GAO, S., NIU, Z., HUANG, N., AND HOU, X. Estimating the Leaf Area Index, height and biomass of maize using HJ-1 and RADARSAT-2 . *International Journal of Applied Earth Observation and Geoinformation* 24, 0 (2013), 1 – 8.



- [69] GHULAM, A. Monitoring tropical forest degradation in Betampona nature reserve, Madagascar using multisource remote sensing data fusion. *Selected Topics in Applied Earth Observations and Remote Sensing, IEEE Journal of* 7, 12 (2014), 4960–4971.
- [70] GHULAM, A., PORTON, I., AND FREEMAN, K. Detecting subcanopy invasive plant species in tropical rainforest by integrating optical and microwave (InSAR/PolInSAR) remote sensing data, and a decision tree algorithm. *Isprs Journal of Photogrammetry and Remote Sensing* 88 (2014), 174–192.
- [71] GUAN, K., WOOD, E., AND CAYLOR, K. Multi-sensor derivation of regional vegetation fractional cover in Africa . *Remote Sensing of Environment* 124, 0 (2012), 653 – 665.
- [72] GUAN, K., WOOD, E. F., MEDVIGY, D., KIMBALL, J., PAN, M., CAYLOR, K. K., SHEFFIELD, J., XU, X., AND JONES, M. O. Terrestrial hydrological controls on land surface phenology of African savannas and woodlands. *Journal of Geophysical Research: Biogeosciences* 119, 8 (2014), 1652–1669.
- [73] HAME, T., KILPI, J., AHOLA, H., RAUSTE, Y., ANTROPOV, O., RAUTIAINEN, M., SIRRO, L., AND BOUNPONE, S. Improved mapping of tropical forests with optical and SAR imagery, Part I: Forest cover and accuracy assessment using multi-resolution data. *Selected Topics in Applied Earth Observations and Remote Sensing, IEEE Journal of* 6, 1 (Feb 2013), 74–91.
- [74] HILL, M., TICEHURST, C., LEE, J.-S., GRUNES, M., DONALD, G., AND HENRY, D. Integration of optical and radar classifications for mapping pasture type in Western Australia. *Geoscience and Remote Sensing, IEEE Transactions on* 43, 7 (2005), 1665–1681.
- [75] HONG, G., ZHANG, A., ZHOU, F., AND BRISCO, B. Integration of optical and synthetic aperture radar (SAR) images to differentiate grassland and alfalfa in Prairie area . *International Journal of Applied Earth Observation and Geoinformation* 28, 0 (2014), 12 – 19.
- [76] HUANG, S., POTTER, C., CRABTREE, R. L., HAGER, S., AND GROSS, P. Fusing optical and radar data to estimate sagebrush, herbaceous, and bare ground cover in Yellowstone. *Remote Sensing of Environment* 114, 2 (2010), 251–264.
- [77] HYDE, P., DUBAYAH, R., WALKER, W., BLAIR, J. B., HOFTON, M., AND HUNSAKER, C. Mapping forest structure for wildlife habitat analysis using multi-sensor

- (LiDAR, SAR/InSAR, ETM+, Quickbird) synergy . *Remote Sensing of Environment* 102, 12 (2006), 63 – 73.
- [78] HYYPPA, J., HYYPPA, H., INKINEN, M., ENGBAHL, M., LINKO, S., AND ZHU, Y. Accuracy comparison of various remote sensing data sources in the retrieval of forest stand attributes. *Forest Ecology and Management* 128, 1-2 (2000), 109–120.
- [79] JIANG, L., LIAO, M., LIN, H., AND YANG, L. Synergistic use of optical and InSAR data for urban impervious surface mapping: a case study in Hong Kong. *International Journal of Remote Sensing* 30, 11 (2009), 2781–2796.
- [80] KIM, Y., KIMBALL, J., DIDAN, K., AND HENEGBRY, G. Response of vegetation growth and productivity to spring climate indicators in the conterminous United States derived from satellite remote sensing data fusion. *Agricultural and Forest Meteorology* 194, 0 (2014), 132 – 143.
- [81] KOVACS, J. M., ZHANG, C., AND FLORES-VERDUGO, F. J. Mapping the condition of mangroves of the Mexican Pacific using C-band ENVISAT ASAR and Landsat optical data. *CIENCIAS MARINAS* 34, 4 (2008), 407–418.
- [82] LAURIN, G. V., LIESENBERG, V., CHEN, Q., GUERRIERO, L., FRATE, F. D., BARTOLINI, A., COOMES, D., WILEBORE, B., LINDSELL, J., AND VALENTINI, R. Optical and SAR sensor synergies for forest and land cover mapping in a tropical site in West Africa . *International Journal of Applied Earth Observation and Geoinformation* 21, 0 (2013), 7 – 16.
- [83] LE HEGARAT-MASCLE, S., BLOCH, I., AND VIDAL-MADJAR, D. Introduction of neighborhood information in evidence theory and application to data fusion of radar and optical images with partial cloud cover. *PATTERN RECOGNITION* 31, 11 (1998), 1811–1823.
- [84] LEHMANN, E. A., CACCETTA, P., LOWELL, K., MITCHELL, A., ZHOU, Z.-S., HELD, A., MILNE, T., AND TAPLEY”, I. SAR and optical remote sensing: Assessment of complementarity and interoperability in the context of a large-scale operational forest monitoring system. *Remote Sensing of Environment* 156 (2015), 335 – 348.
- [85] LEHMANN, E. A., CACCETTA, P. A., ZHOU, Z.-S., MCNEILL, S. J., WU, X., AND MITCHELL, A. L. Joint Processing of Landsat and ALOS-PALSAR Data for Forest Mapping and Monitoring. *IEEE Transactions on Geoscience and Remote Sensing* 50, 1 (2012), 55–67.

- [86] LOZANO-GARCIA, D. F., AND HOFFER, R. M. Synergistic effects of combined Landsat-TM and SIR-B data for forest resources assessment. *International Journal of Remote Sensing* 14, 14 (1993), 2677–2694.
- [87] LUCAS, R. M., CLEWLEY, D., ACCAD, A., BUTLER, D., ARMSTON, J., BOWEN, M., BUNTING, P., CARREIRAS, J., DWYER, J., EYRE, T., KELLY, A., MCALPINE, C., POLLOCK, S., AND SEABROOK, L. Mapping forest growth and degradation stage in the Brigalow Belt Bioregion of Australia through integration of ALOS PALSAR and Landsat-derived foliage projective cover data. *Remote Sensing of Environment* 155 (2014), 42 – 57.
- [88] MAGNUSSON, M., AND FRANSSON, J. E. Combining airborne CARABAS-II VHF SAR data and optical SPOT-4 satellite data for estimation of forest stem volume. *Canadian Journal of Remote Sensing* 30, 4 (2004), 661–670.
- [89] MAGNUSSON, M., AND FRANSSON, J. E. S. Airborne low-frequency synthetic aperture radar and optical satellite data as complementary data sources for forest stem volume estimation. *Scandinavian Journal of Forest Research* 25, 1 (2010), 89–99.
- [90] MAILLARD, P., ALENCAR-SILVA, T., AND CLAUSI, D. A. An evaluation of Radarsat-1 and ASTER data for mapping veredas (palm swamps). *SENSORS* 8, 9 (2008), 6055–6076.
- [91] MANGIAROTTI, S., MAZZEGA, P., JARLAN, L., MOUGIN, E., BAUP, F., AND DEMARTY, J. Evolutionary bi-objective optimization of a semi-arid vegetation dynamics model with NDVI and  $\sigma_0$  satellite data. *Remote Sensing of Environment* 112, 4 (2008), 1365 – 1380.
- [92] MOGHADDAM, M., DUNGAN, J., AND ACKER, S. Forest variable estimation from fusion of SAR and multispectral optical data. *IEEE Transactions on Geoscience and Remote Sensing* 40, 10 (2002), 2176–2187.
- [93] RAMSEY, ELIJAHW., I., NELSON, G., AND SAPKOTA, S. Classifying coastal resources by integrating optical and radar imagery and color infrared photography. *Mangroves and Salt Marshes* 2, 2 (1998), 109–119.
- [94] RANSON, K., KOVACS, K., SUN, G., AND KHARUK, V. Disturbance recognition in the boreal forest using radar and Landsat-7. *CANADIAN JOURNAL OF REMOTE SENSING* 29, 2 (2003), 271–285.

- [95] REICHE, J., SOUZAX, C., HOEKMAN, D., VERBESSELT, J., PERSAUD, H., AND HEROLD, M. Feature Level Fusion of Multi-Temporal ALOS PALSAR and Landsat Data for Mapping and Monitoring of Tropical Deforestation and Forest Degradation. *Selected Topics in Applied Earth Observations and Remote Sensing, IEEE Journal of* 6, 5 (2013), 2159–2173.
- [96] REICHE, J., VERBESSELT, J., HOEKMAN, D., AND HEROLD, M. Fusing Landsat and SAR time series to detect deforestation in the tropics . *Remote Sensing of Environment* 156 (2015), 276 – 293.
- [97] RIGNOT, E., SALAS, W. A., AND SKOLE, D. L. Mapping deforestation and secondary growth in Rondonia, Brazil, using imaging radar and thematic mapper data . *Remote Sensing of Environment* 59, 2 (1997), 167 – 179.
- [98] RYAN, C., WILLIAMS, M., HILL, T., GRACE, J., AND WOODHOUSE, I. Assessing the phenology of southern tropical Africa: A comparison of hemispherical photography, scatterometry, and Optical/NIR remote sensing. *Geoscience and Remote Sensing, IEEE Transactions on* 52, 1 (2014), 519–528.
- [99] SAATCHI, S. S., HARRIS, N. L., BROWN, S., LEFSKY, M., MITCHARD, E. T. A., SALAS, W., ZUTTA, B. R., BUERMANN, W., LEWIS, S. L., HAGEN, S., PETROVA, S., WHITE, L., SILMAN, M., AND MOREL, A. Benchmark map of forest carbon stocks in tropical regions across three continents. *Proceedings of the National Academy of Sciences* 108, 24 (2011), 9899–9904.
- [100] SCHWARZ, M., STEINMEIER, C., HOLECZ, F., STEBLER, O., AND WAGNER, H. Detection of windthrow in mountainous regions with different remote sensing data and classification methods. *Scandinavian Journal Of Forest Research* 18, 6 (2003), 525–536.
- [101] SHAMSODDINI, A., TRINDER, J. C., AND TURNER, R. Paired-data fusion for improved estimation of pine plantation structure. *International Journal of Remote Sensing* 36, 8 (2015), 1995–2009.
- [102] SHEORAN, A., AND HAACK, B. Classification of California agriculture using quad polarization radar data and Landsat Thematic Mapper data. *GIScience and Remote Sensing* 50, 1 (2013), 50–63.
- [103] SMARA, Y., BELHADJ-AISSA, A., SANSAL, B., LICHTENEGGER, J., AND BOUZENOUNE, A. Multisource ERS-1 and optical data for vegetal cover assessment

- and monitoring in a semi-arid region of Algeria. *International Journal of Remote Sensing* 19, 18 (1998), 3551–3568.
- [104] STROPPIANA, D., AZAR, R., CALÒ, F., PEPE, A., IMPERATORE, P., BOSCHETTI, M., SILVA, J. M. N., BRIVIO, P. A., AND LANARI, R. Integration of Optical and SAR Data for Burned Area Mapping in Mediterranean Regions. *Remote Sensing* 7, 2 (2015), 1320.
- [105] TAIT, A., HALL, D., FOSTER, J., AND ARMSTRONG, R. Utilizing multiple datasets for snow-cover mapping. *Remote Sensing of Environment* 72, 1 (2000), 111 – 126.
- [106] TREUHART, R., ASNER, G., AND LAW, B. Structure-based forest biomass from fusion of radar and hyperspectral observations. *GEOPHYSICAL RESEARCH LETTERS* 30, 9 (2003).
- [107] VAN BEIJMA, S., COMBER, A., AND LAMB, A. Random forest classification of salt marsh vegetation habitats using quad-polarimetric airborne SAR, elevation and optical RS data. *Remote Sensing of Environment* 149 (2014), 118–129.
- [108] WALKER, W. S., STICKLER, C. M., KELLNDORFER, J. M., KIRSCH, K. M., AND NEPSTAD, D. C. Large-Area Classification and Mapping of Forest and Land Cover in the Brazilian Amazon: A Comparative Analysis of ALOS/PALSAR and Landsat Data Sources. *IEEE JOURNAL OF SELECTED TOPICS IN APPLIED EARTH OBSERVATIONS and REMOTE SENSING* 3, 4, 2 (2010), 594–604.
- [109] WANG, C., AND QI, J. Biophysical estimation in tropical forests using JERS-1 SAR and VNIR imagery. II. Aboveground woody biomass. *International Journal of Remote Sensing* 29, 23 (2008), 6827–6849.
- [110] WANG, J., XIAO, X., QIN, Y., DONG, J., ZHANG, G., KOU, W., JIN, C., ZHOU, Y., AND ZHANG, Y. Mapping paddy rice planting area in wheat-rice double-cropped areas through integration of Landsat-8 OLI, MODIS, and PALSAR images. *Scientific Reports* 5, 10088 (2015).
- [111] WASKE, B., AND VAN DER LINDEN, S. Classifying multilevel imagery from SAR and optical sensors by decision fusion. *IEEE Transactions on Geoscience and Remote Sensing* 46, 5 (2008), 1457–1466.
- [112] WONG, F. K. K., AND FUNG, T. Combining EO-1 Hyperion and Envisat ASAR data for mangrove species classification in Mai Po Ramsar Site, Hong Kong. *International Journal of Remote Sensing* 35, 23 (2014), 7828–7856.
